# Supplementary material for: Molecular modeling approach to explore the role of cathepsin B from Hordeum vulgare in the degradation of Aβ peptides
Source: Royal Society of Chemistry journal article supplement (doi:10.1039/c5mb00718f), 2015-11-04
Supplement: c5mb00718f1.pdf [file c5mb00718f1.pdf]

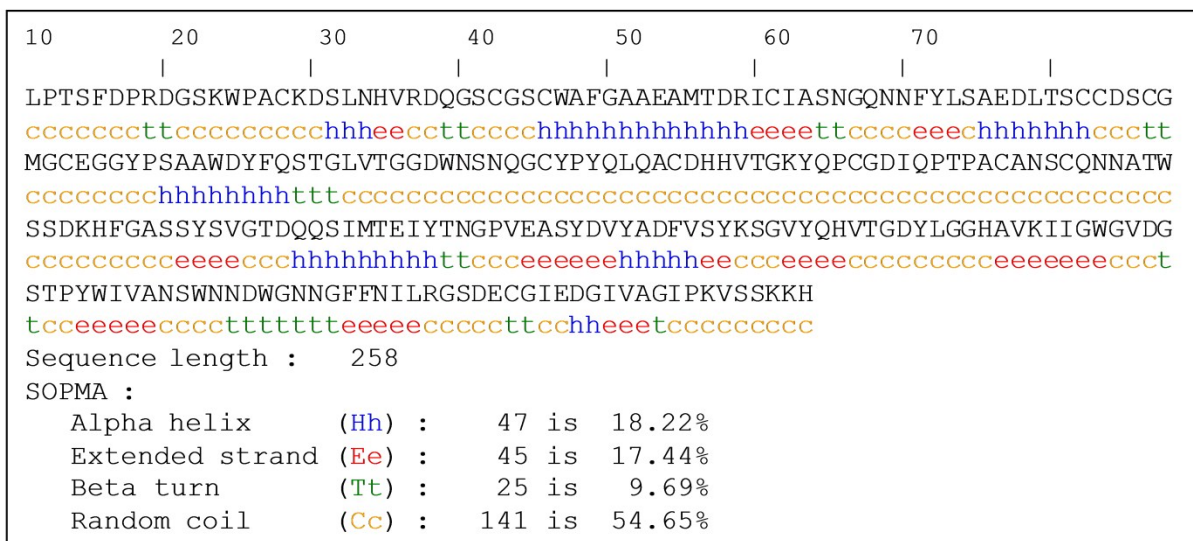

**Fig. S1.** Secondary structure prediction of the Cathepsin B from *Hordeum vulgare* sequence by SOPMA.



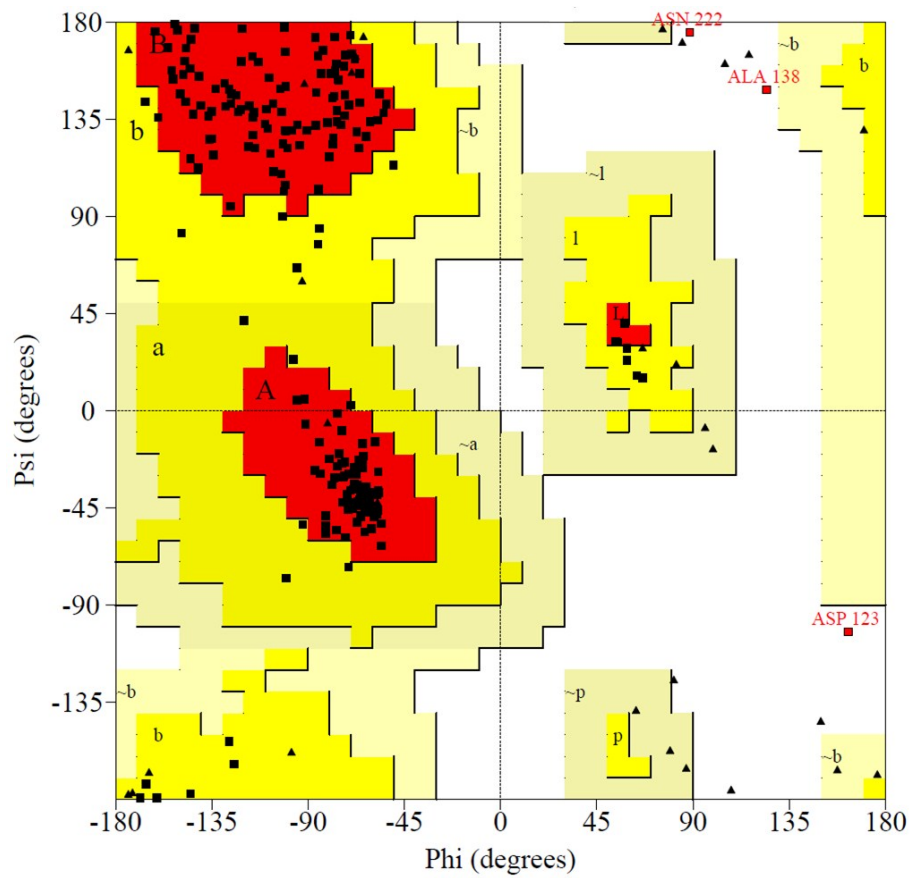

**Fig. S 3.** Ramchandran plot analysis of Cathepsin B from *Hordeum vulgare*.
